# Supplementary material for: Selective decomposition of hydrazine over metal free carbonaceous materials
Source: Royal Society of Chemistry journal article supplement (doi:10.1039/d1cp05179b), 2021-12-30
Supplement: d1cp05179b1.pdf [file d1cp05179b1.pdf]

## Supplementary informations

### Hydrazine selective decomposition over metal free carbonaceous materials

*Ilaria Barlocco<sup>a</sup>, Silvio Bellomi<sup>a</sup>, Simone Tumiati<sup>c</sup>, Patrizia Fumagalli<sup>c</sup>, Nikolaos Dimitratos<sup>d</sup>, Alberto Roldan<sup>\*b</sup>, Alberto Villa<sup>\*a</sup>*

<sup>a</sup> Dipartimento di Chimica, Università degli Studi di Milano, via Golgi 19, I-20133Milano, Italy

<sup>b</sup> Cardiff Catalysis Institute, School of Chemistry, Cardiff University, Main Building, Park Place, CF10 3AT, Cardiff, United Kingdom

<sup>c</sup> Dipartimento di Scienze della Terra Ardito Desio, Università degli Studi di Milano, via Mangiagalli 34, I-20133 Milano, Italy

<sup>d</sup> Dipartimento di Chimica Industriale e dei Materiali, ALMA MATER STUDIORUM Università di Bologna, Viale Risorgimento 4, 40136 Bologna, Italy

\*Corresponding authors

E-mail addresses: Alberto.Villa@unimi.it (A. Villa), RoldanMartinezA@cardiff.ac.uk (A. Roldan)

The present supplementary information document contains in figure S1 and S2 the optimized graphitic surfaces obtained by DFT optimization and the charge density Laplacian analysis iso-surfaces plot of PG, SV, DV, SW, VSW1 and VSW2, respectively. Table S1 and S2 reports the energetic for NH<sub>3</sub> probe molecule on the individuated active sites, respectively for SV and DV. In Figure S3 to S6 the hydrogen diffusion and recombination pathways and energy profiles are showed. Finally, figure S7 presents the difference between the second symmetric and asymmetric dehydrogenation step.

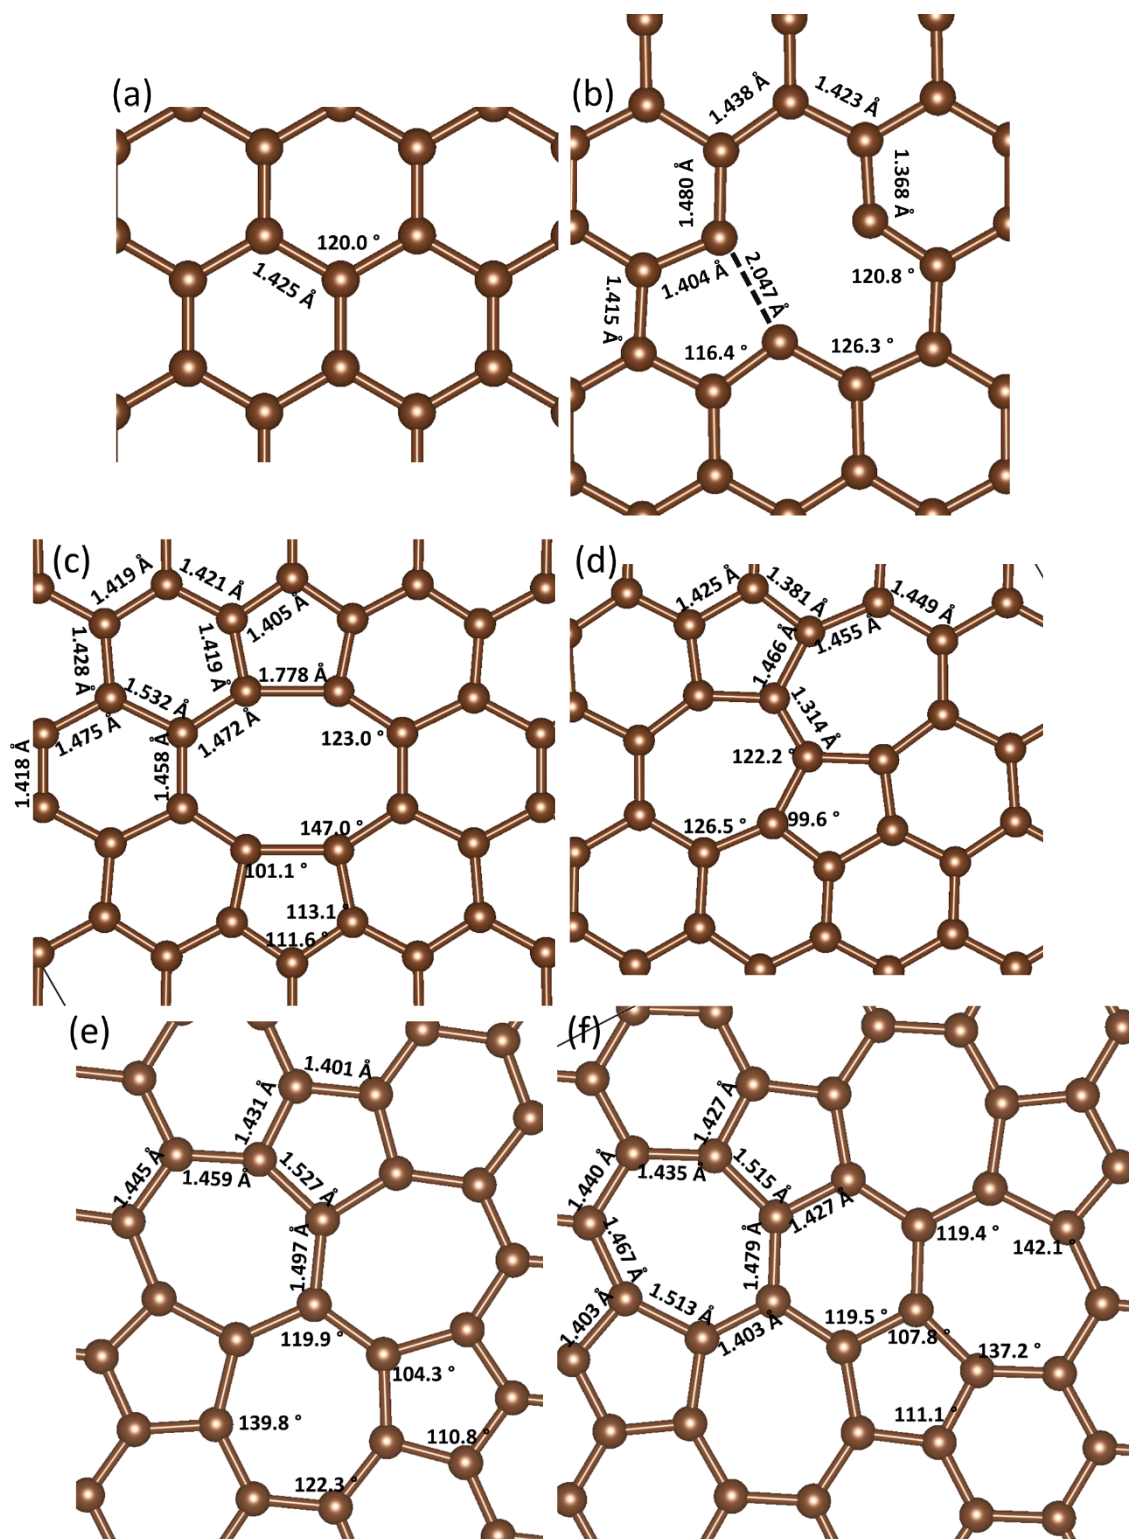

Figure S1: Top view of the optimized graphitic surfaces: a) pristine graphene b) SV c) DV d) SW e) VSW1 f) VSW2. Inset, distances (Å) and angles (°) of interest. Carbon atoms are brown.

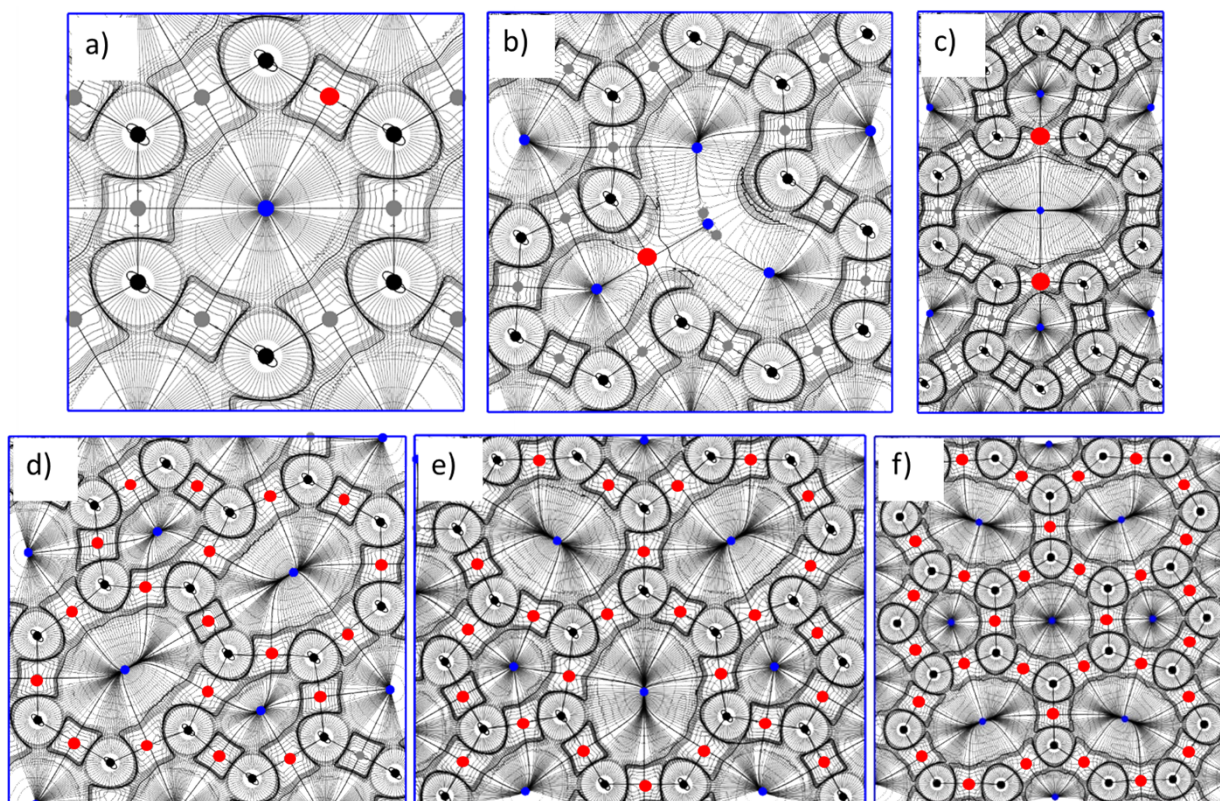

Figure S2: Charge density Laplacian analysis iso-surfaces plot of: a) PG, b) SV, c) DV, d) SW, e) VSW1 and f) VSW2. Red circles indicate where the Bond Critical Point analysis was performed for our purposes. Black circles indicate nuclear charge density maxima, grey Bond Critical Points and blue Ring Critical Points.

Table S1 NH<sub>3</sub> probe molecule, adsorption energetic for SV. From all the tested configurations, only the stable one are reported. The symmetric counterparts (e.g. X-C<sub>3</sub>' Y-C<sub>3</sub> to Y-C<sub>3</sub>' X-C<sub>3</sub>) returned the same adsorption value within the computational precision due to the symmetry effect. The labels refer to Figure 3 in main paper.

| Chemisorption (eV)     | Dissociative (eV)                                        |
|------------------------|----------------------------------------------------------|
| C <sub>3</sub> -1.17   | H <sub>2</sub> N-C <sub>3</sub> H-C <sub>3</sub> ' -2.05 |
| C <sub>3</sub> ' -1.17 | H <sub>2</sub> N-C <sub>3</sub> H-C <sub>7</sub> -2.05   |
| C <sub>7</sub> -1.01   | H <sub>2</sub> N-C <sub>3</sub> ' H-C <sub>7</sub> -2.05 |

Table S2 NH<sub>3</sub> probe molecule, adsorption energetic for DV. From all the tested configurations, only the stable one are reported. The symmetric counterparts (e.g. X-C<sub>3</sub>' Y-C<sub>3</sub> to Y-C<sub>3</sub>' X-C<sub>3</sub>) returned the same adsorption value within the computational precision due to the symmetry effect. Where a '/' is present, an

| Chemisorption | Dissociative                                                |
|---------------|-------------------------------------------------------------|
| /             | H <sub>2</sub> N-C <sub>3</sub> H-C <sub>3</sub> ' -1.59 eV |

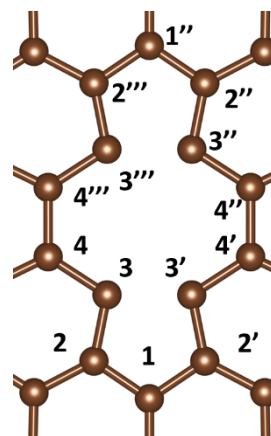

endothermic adsorption was obtained.

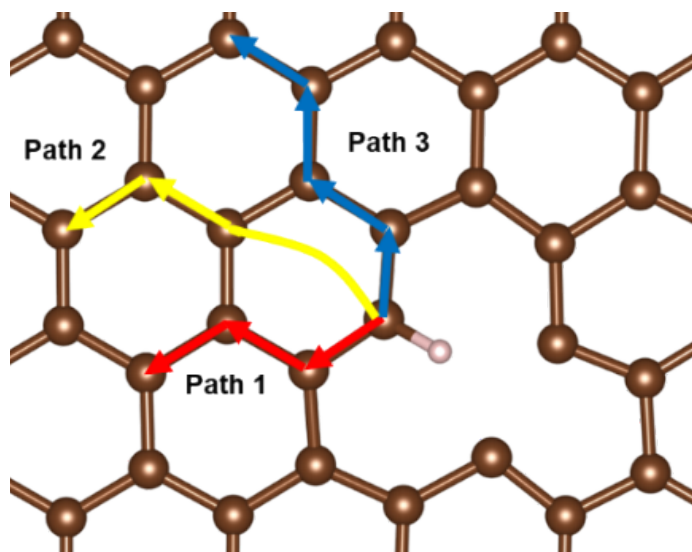

Figure S3: Out of vacancy atomic hydrogen diffusion pathways.

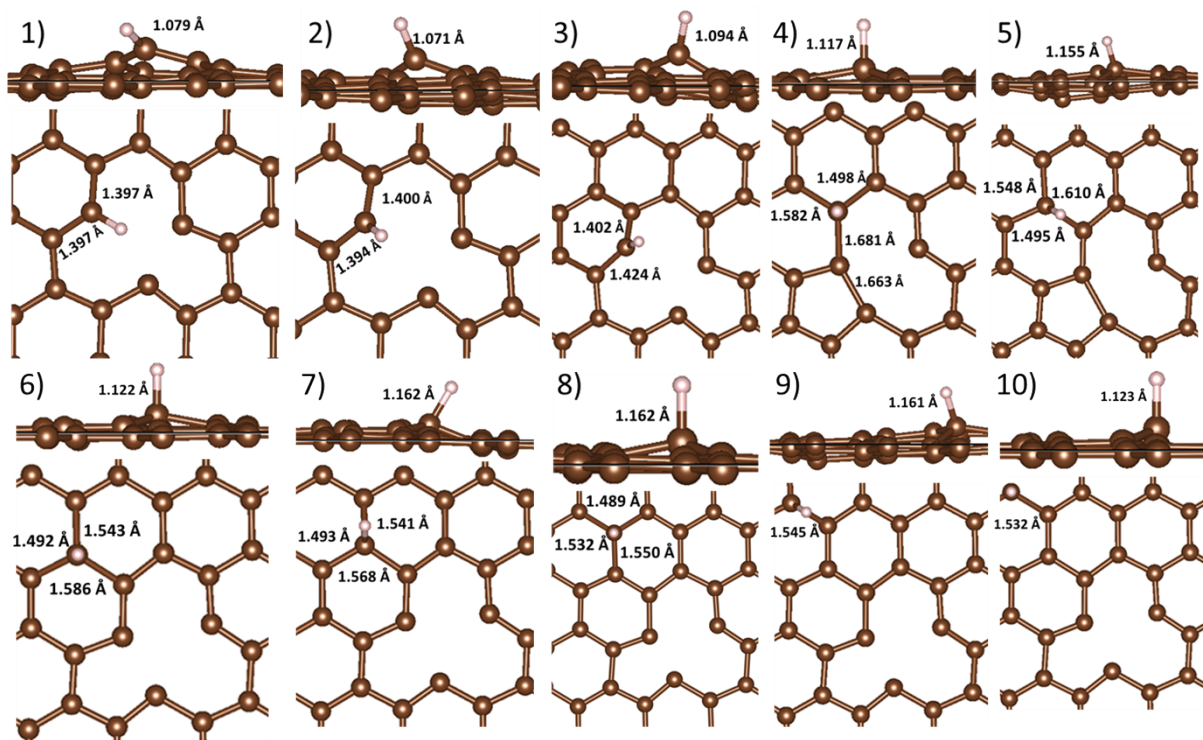

Figure S4: Top and side view of the most favourable steps of hydrogen diffusion process. Inset, distances (Å) and angles (°) of interest. Carbon atom is labelled in brown and hydrogen in white.

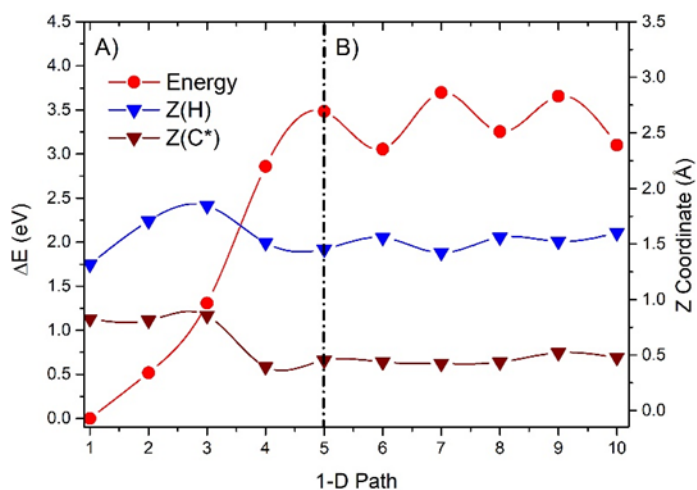

Figure S5: Hydrogen diffusion on SV system. A, left side) Vacancy influence B, right side) Graphene-like behaviour. Red profile: hydrogen diffusion energy profile. Blue profile: H z-coordinate fluctuations. Brown profile: C atom bonded with H z-coordinate fluctuations.

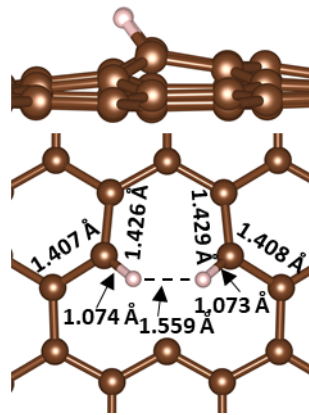

Figure S6: Hydrogen recombination on SV system. Inset, distances (Å) and angles (°) of interest. Carbon atom is labelled in brown and hydrogen in white

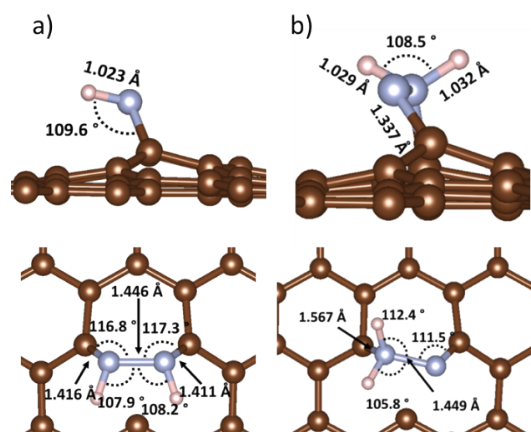

Figure S7: Top and side view of second de-hydrogenation step: a) Symmetric decomposition and b) Asymmetric decomposition. Inset are distances (Å) and angles (°) of interest. Carbon atom is labelled in brown, nitrogen in blue and hydrogen in white.  $\Delta E_{\text{Asymm--Symm}} = 0.739 \text{ eV}$
